# Supplementary material
Source: PubMed Central journal article supplement (PMC5681426)
Supplement: NIHMS912163-supplement-311819_Online.pdf [file NIHMS912163-supplement-311819_Online.pdf]

## Supplemental Material

### Supplemental Table I

#### First Antibody

| <u>Isotype/Source/Cat. No./Clone</u> | <u>Concentration</u>                              |        |
|--------------------------------------|---------------------------------------------------|--------|
| $\alpha$ SMA                         | Mouse IgG/Sigma/0837M4778V/Mab                    | 1:250  |
| MCT1                                 | Mouse IgG/Novus Bio/14612/Mab                     | 1:500  |
| NDRG3                                | Rabbit IgG/ Novus Bio /NBP1-86054/Polyclonal      | 1:250  |
| MCT4                                 | Rabbit IgG/ St John's Lab / STJ94050 / Polyclonal | 1:500  |
| $\beta$ -actin                       | Mouse IgG/ Thermo Sci/ MA1-744/Mab                | 1:500  |
| Ki-67                                | Rabbit IgG/ Thermo Sci / 701198/Mab               | 1:250  |
| Vimentin                             | Rabbit IgG/Abcam/ ab92547/MAB                     | 1:500  |
| MYH11                                | Rabbit IgG/Abcam/ ab53219/MAB                     | 1:250  |
| Calponin                             | Rabbit IgG/ Santa Cruz /sc-16604/Polyclonal       | 1:150  |
| Collegen I                           | Rabbit IgG/Abcam/ ab34671/polyclonal              | 1:500  |
| Caspase3                             | Rabbit IgG/Abcam/ ab115183/polyclonal             | 1:250  |
| Annexin 5                            | Mouse IgG/Abcam/ ab54775/Mab                      | 1:250  |
| bcl-2                                | Rabbit IgG/Abcam/ ab59348/polyclonal              | 1:500  |
| Raf                                  | Mouse IgG/BD transduction lab/ clone 53/Mab       | 1:500  |
| p-raf                                | Rabbit IgG/cell signaling/ 56A6/polyclonal        | 1:500  |
| erk                                  | Rabbit IgG/cell signaling/ erk1/2/polyclonal      | 1:500  |
| p-erk                                | Rabbit IgG/cell signaling/ Thr202/4/polyclonal    | 1:500  |
| mTOR                                 | Rabbit IgG/Abcam/ ab2732/polyclonal               | 1:1000 |
| AMPK                                 | Rabbit IgG/Abcam/ ab3759/polyclonal               | 1:2000 |
| Yap                                  | Rabbit IgG/cell signaling/ D8H1X/polyclonal       | 1:500  |

## **Second Antibody**

| <b><u>Isotype/Source/Cat. No./Clone</u></b>                   | <b><u>Concentration</u></b> |
|---------------------------------------------------------------|-----------------------------|
| FITC Donkey Anti-mouse IgG/703-099-155                        | 1:100                       |
| FITC Donkey Anti-rabbit IgG/711-095-152                       | 1:100                       |
| TRITC Donkey Anti-mouse IgG/Jackson Lab/712-025-150           | 1:100                       |
| TRITC Donkey Anti-rabbit IgG/ Jackson Lab/711-026-152         | 1:100                       |
| Alexa-Fluor647 Donkey Anti-mouse IgG/Jackson Lab/715-495-140  | 1:100                       |
| Alexa-Fluor647 Donkey Anti-rabbit IgG/Jackson Lab/711-605-152 | 1:100                       |
| HRP-Goat Anti-mouse IgG/703-099-155                           | 1:1000                      |
| HRP-Goat Anti-rabbit IgG/711-095-152                          | 1:1000                      |
